# Supplementary material for: High Eu3+ concentration quenching in Y3TaO7 solid solution for orange-reddish emission in photonics
Source: Royal Society of Chemistry journal article supplement (doi:10.1039/d0ra01912g), 2020-01-01
Supplement: d0ra01912g1.pdf [file d0ra01912g1.pdf]

## Supporting Information

### **High Eu<sup>3+</sup> concentration quenching in Y<sub>3</sub>TaO<sub>7</sub> solid solution for Orange-reddish emission in photonics**

Fernanda Hediger Borges,<sup>a</sup> Fábio José Caixeta<sup>a</sup>, Rafael Ramiro Pereira<sup>a</sup>, Silvana Ruella de Oliveira<sup>a</sup>, Rute A.S. Ferreira<sup>b</sup>, and Rogéria Rocha Gonçalves<sup>a\*</sup>

<sup>a</sup> *Laboratório de Materiais Luminescentes Micro e Nanoestruturados-Mater Lumen, Departamento de Química, FFCLRP, Universidade de São Paulo, SP, Brazil.*

<sup>b</sup> *Phantom-G, CICECO-Aveiro Institute of Materials, and Department of Physics, University of Aveiro, Aveiro, Portugal.*

\*Corresponding author e-mail: rrgoncalves@ffclrp.usp.br

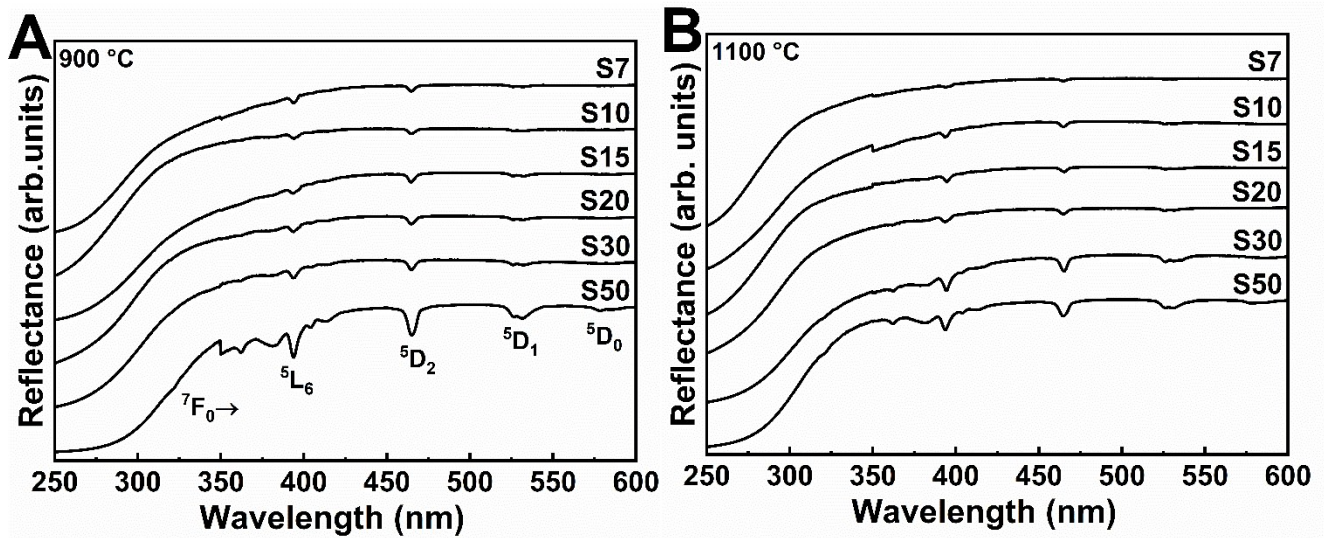

Figure S1. DRS spectra of  $\text{Eu}^{3+}$ -doped  $\text{Y}_3\text{TaO}_7$  annealed at (A) 900 °C and (B) 1100 °C.

### 1. Structural and vibrational properties

Figures S23 and S2B present the DRS spectra of samples S7–S50 annealed at 900 or 1100 °C. Absorption bands emerge at 394, 465, 530, and 580 nm, which can be assigned to  $\text{Eu}^{3+}$  f-f transitions from the ground states  ${}^7\text{F}_{0,1}$  to the  ${}^5\text{L}_6$ ,  ${}^5\text{D}_2$ ,  ${}^5\text{D}_1$ , and  ${}^5\text{D}_0$

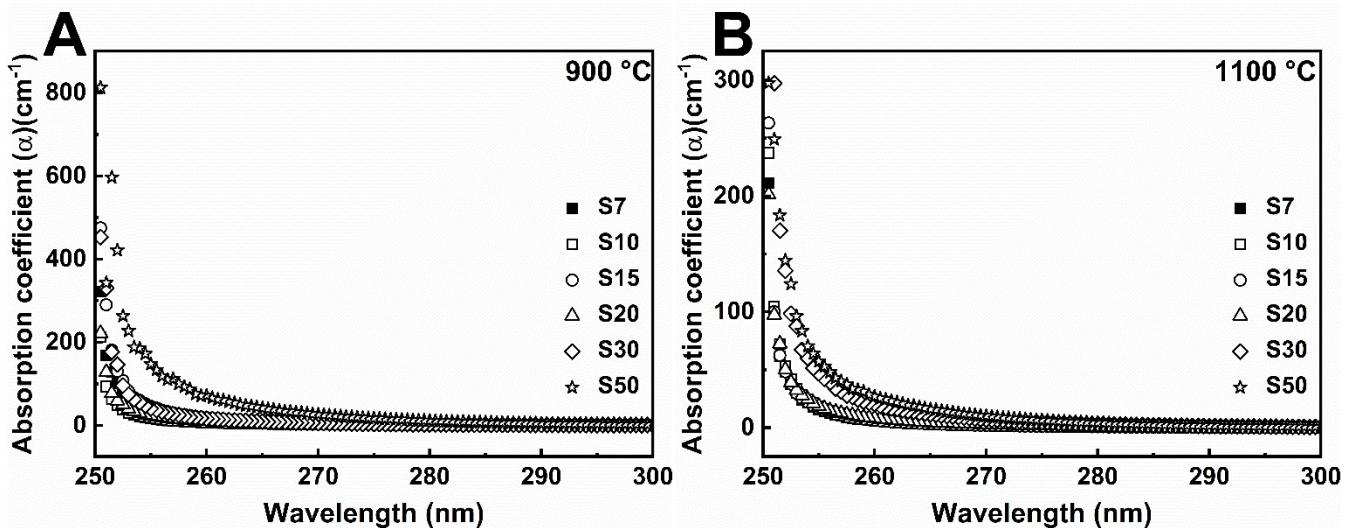

Figure S2. Absorption coefficient ( $\alpha$ ) as a function of the wavelength of  $\text{Eu}^{3+}$ -doped  $\text{Y}_3\text{TaO}_7$  samples annealed at (A) 900 °C and (B) 1100 °C.

excited states, respectively.

Figures 3A and 3C present the absorption coefficient ( $\alpha$ ) of calculated by Kubelka-Munk equation <sup>1</sup> for samples S7–S50 annealed at 900 or 1100 °C from the reflectance data.

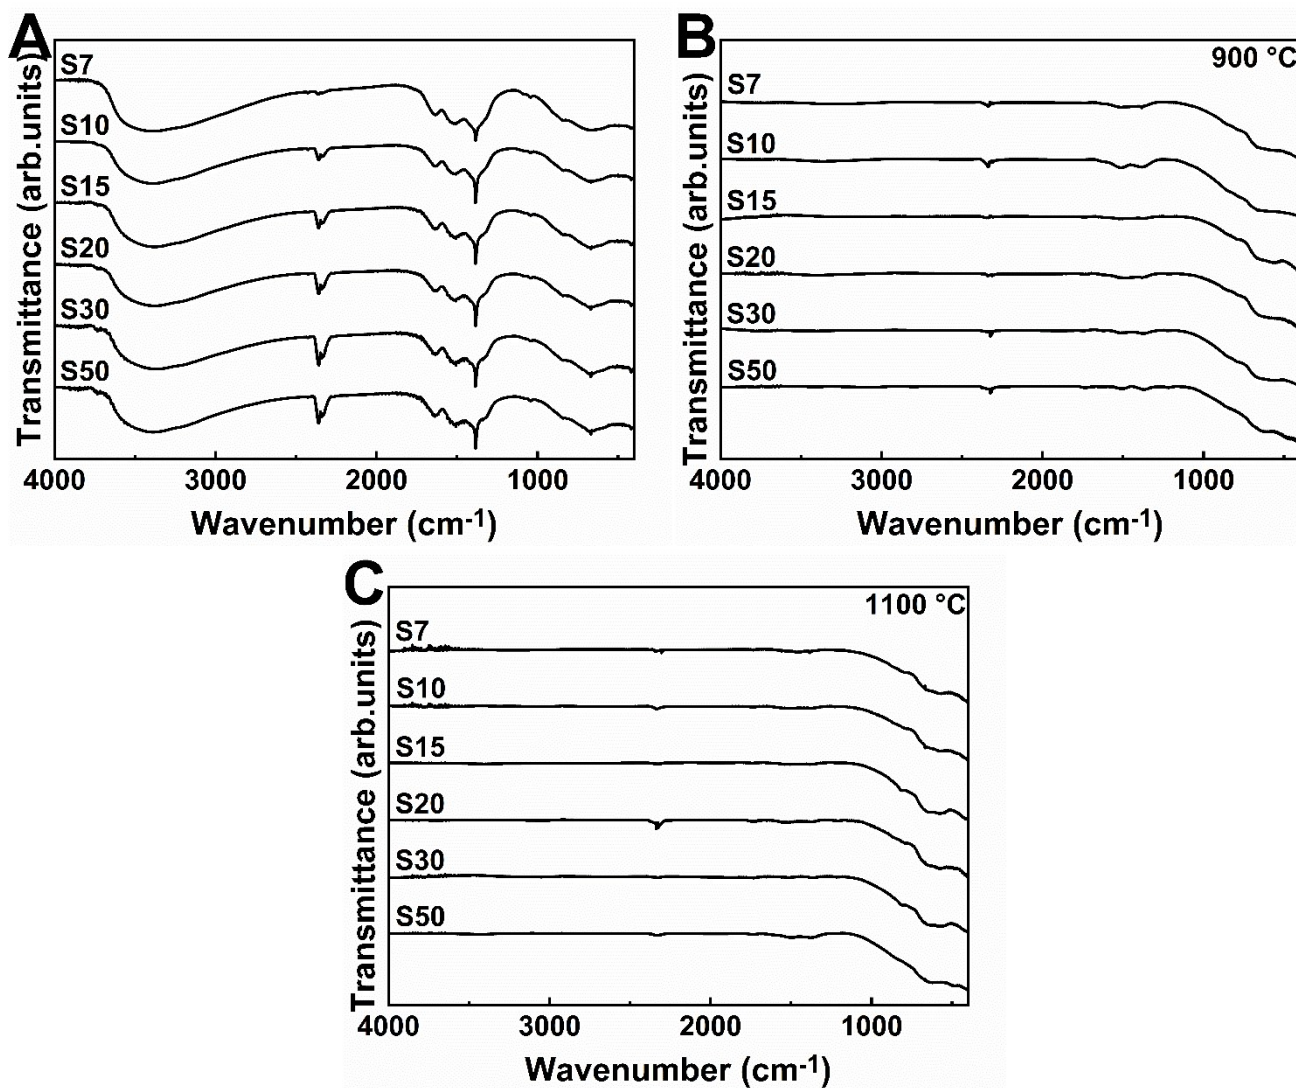

Figure S3. FTIR spectra of pure and Eu<sup>3+</sup>-doped Y<sub>3</sub>TaO<sub>7</sub> samples (A) without annealing or annealed at (B) 900 or (C) 1100 °C.

We analyzed Eu<sup>3+</sup>-doped Y<sub>3</sub>TaO<sub>7</sub> samples without annealing and annealed at 900 or 1100 °C by FTIR (Figures 4A, 4B, and 4C). The non-annealed samples present a broad band centered at about 3400 cm<sup>-1</sup>, assigned to OH and CH stretching vibrations. The bands at 1640, 1520, and 1380 cm<sup>-1</sup> are attributed to H-OH angular deformation, C-H deformation, and carbonate group  $\nu_3$  vibrational modes, respectively, of water and organic residues <sup>2,3</sup>. For the annealed samples, the spectra indicate full removal of water and

organic substances, which could decrease luminescence and quantum emission efficiency by the non-radiative process through excited-state deactivation. Samples S7–S50 annealed at 900 and 1100 °C have quite similar spectra. The bands around 820 cm<sup>-1</sup>, from 660 to 620 cm<sup>-1</sup>, and at 440 cm<sup>-1</sup> correspond to Ta-O-Ta and Ta-O vibration<sup>4,5</sup>, and the bands below 520 cm<sup>-1</sup> are characteristic of Y-O vibration<sup>6</sup> can be seen in Figures 4B and 4C. We highlight that Y<sub>3</sub>TaO<sub>7</sub> has relatively low phonon energy.

## 2. Luminescent properties

**Table S1.** Ratios between the intensities of the <sup>5</sup>D<sub>0</sub>→<sup>7</sup>F<sub>2</sub> and <sup>5</sup>D<sub>0</sub>→<sup>7</sup>F<sub>1</sub> transitions for different Eu<sup>3+</sup> concentrations and annealing temperatures for Eu<sup>3+</sup>-doped Y<sub>3</sub>TaO<sub>7</sub> samples under different excitation wavelengths.

| Annealing temperatures | Samples | $\frac{I(^5D_0 \rightarrow ^7F_2)}{I(^5D_0 \rightarrow ^7F_1)}$ |           |           |
|------------------------|---------|-----------------------------------------------------------------|-----------|-----------|
|                        |         | CTB                                                             | 394.0 nm  | 464.0 nm  |
| 900 °C                 | S7      | 4.3 ± 0.3                                                       | 4.4 ± 0.3 | 4.6 ± 0.3 |
|                        | S10     | 4.6 ± 0.4                                                       | 4.5 ± 0.3 | 4.7 ± 0.3 |
|                        | S15     | 4.2 ± 0.3                                                       | 4.3 ± 0.3 | 4.4 ± 0.4 |
|                        | S20     | 4.3 ± 0.3                                                       | 4.3 ± 0.3 | 4.3 ± 0.4 |
|                        | S30     | 4.3 ± 0.3                                                       | 4.4 ± 0.4 | 4.5 ± 0.4 |
|                        | S50     | 5.2 ± 0.7                                                       | 5.5 ± 0.9 | 5.9 ± 0.9 |
| 1100 °C                | S7      | 3.1 ± 0.2                                                       | 3.4 ± 0.3 | 3.6 ± 0.4 |
|                        | S10     | 3.3 ± 0.2                                                       | 3.6 ± 0.3 | 3.7 ± 0.3 |
|                        | S15     | 3.2 ± 0.2                                                       | 3.9 ± 0.3 | 3.5 ± 0.2 |
|                        | S20     | 3.0 ± 0.2                                                       | 3.1 ± 0.2 | 3.1 ± 0.2 |
|                        | S30     | 3.3 ± 0.2                                                       | 4.0 ± 0.7 | 3.6 ± 0.2 |
|                        | S50     | 3.9 ± 0.4                                                       | 4.1 ± 0.5 | 4.5 ± 0.7 |





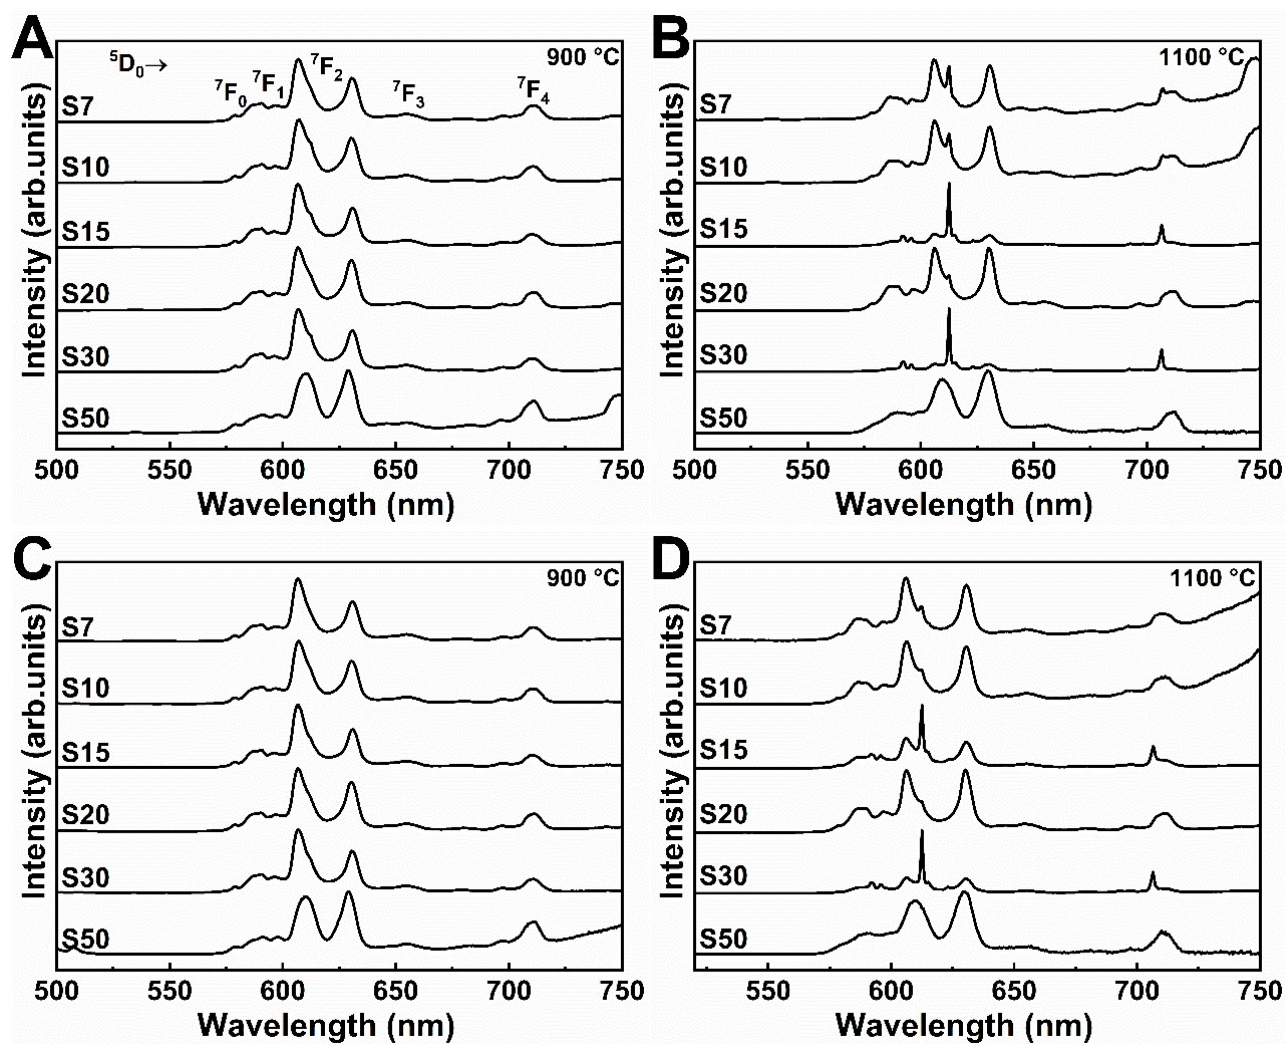

Figure S4. Emission spectra under excitation at (A) and (B) 394 nm and (C) and (D) 464 nm of  $\text{Eu}^{3+}$ -doped  $\text{Y}_3\text{TaO}_7$  samples annealed at 900 or 1100 °C as indicated.

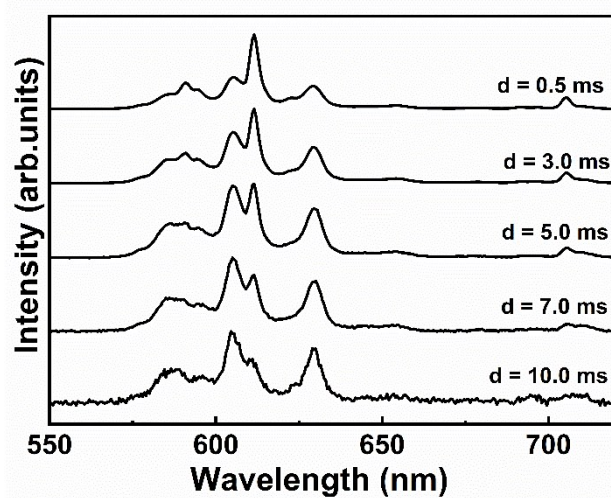

Figure S5. Time-resolved emission spectra under excitation at 393.0 nm of sample S15 annealed at 1100 °C.

Figure S5 shows the time-resolved emission spectra of the same sample under 392.5 nm excitation and the delay times were 0, 1, 5, and 10 ms. Since the lifetime of  $\text{Eu}^{3+}$  excited state in  $\text{YTaO}_4$  (Table 3) is lower than the lifetime of  $\text{Eu}^{3+}$  in  $\text{Y}_3\text{TaO}_7$  (Table 2), it is possible to observe that the intensity of the single peak at 611.5 nm diminishes with the increase of the delay time. However, the emission decay curves of  $^5\text{D}_0$  excited state of  $\text{Eu}^{3+}$  distributed into  $\text{Y}_3\text{TaO}_7$  exhibited a single exponential behavior. Thus, it was not possible to distinguish different symmetry sites with the increase of the delay, only to

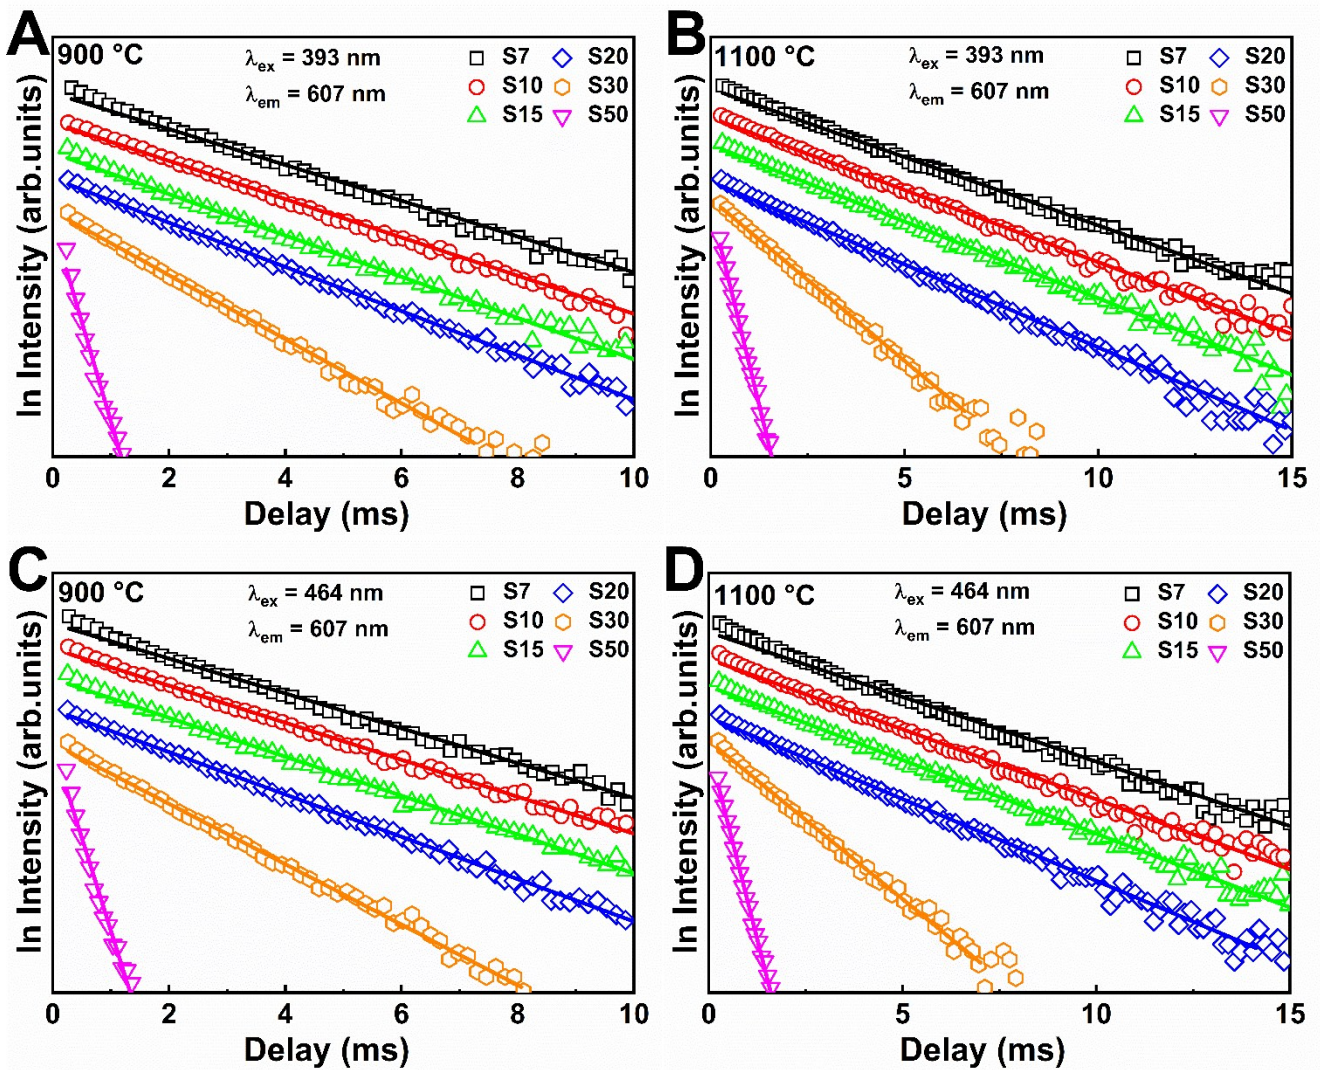

Figure S6. PL decay curves for the  $\text{Eu}^{3+} ^5\text{D}_0$  excited state under excitation at (A, B) 393 nm and (C, D) 464 nm of  $\text{Eu}^{3+}$ -doped  $\text{Y}_3\text{TaO}_7$  samples annealed at 900 or 1100 °C. with fixed emission at 607 nm

observe a similar spectral profile with the broad spectra of Figure 4.



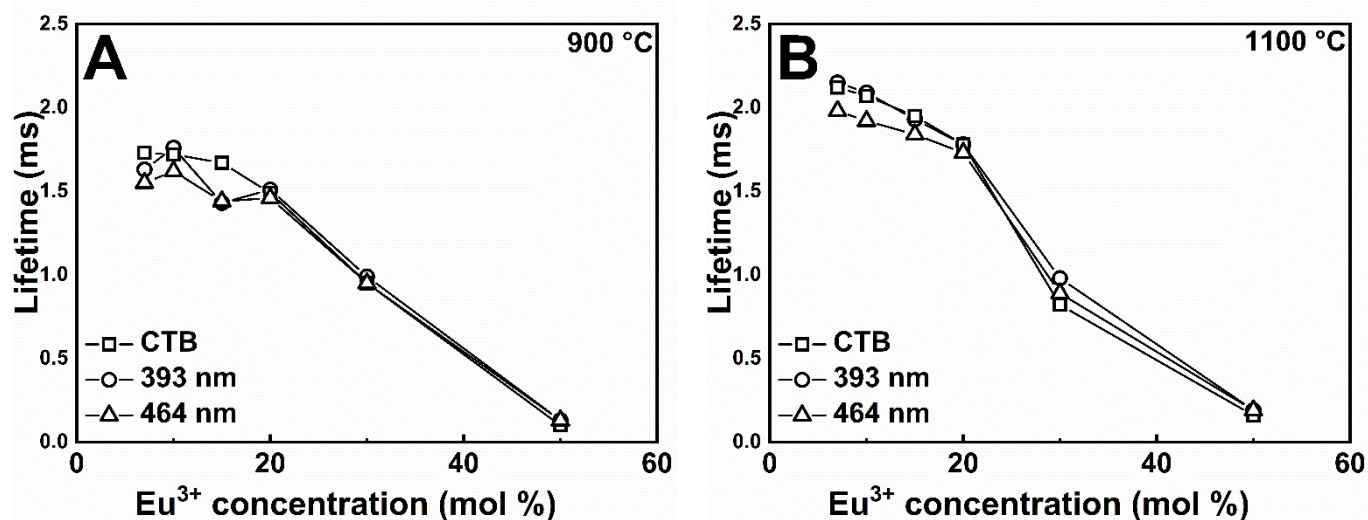

Figure S7. Lifetime ( $\tau_{1/e}$ ) values as a function of  $\text{Eu}^{3+}$  concentration of  $\text{Y}_3\text{TaO}_7$  samples annealed at (A) 900 or (B) 1100 °C. The lines are visual guides.

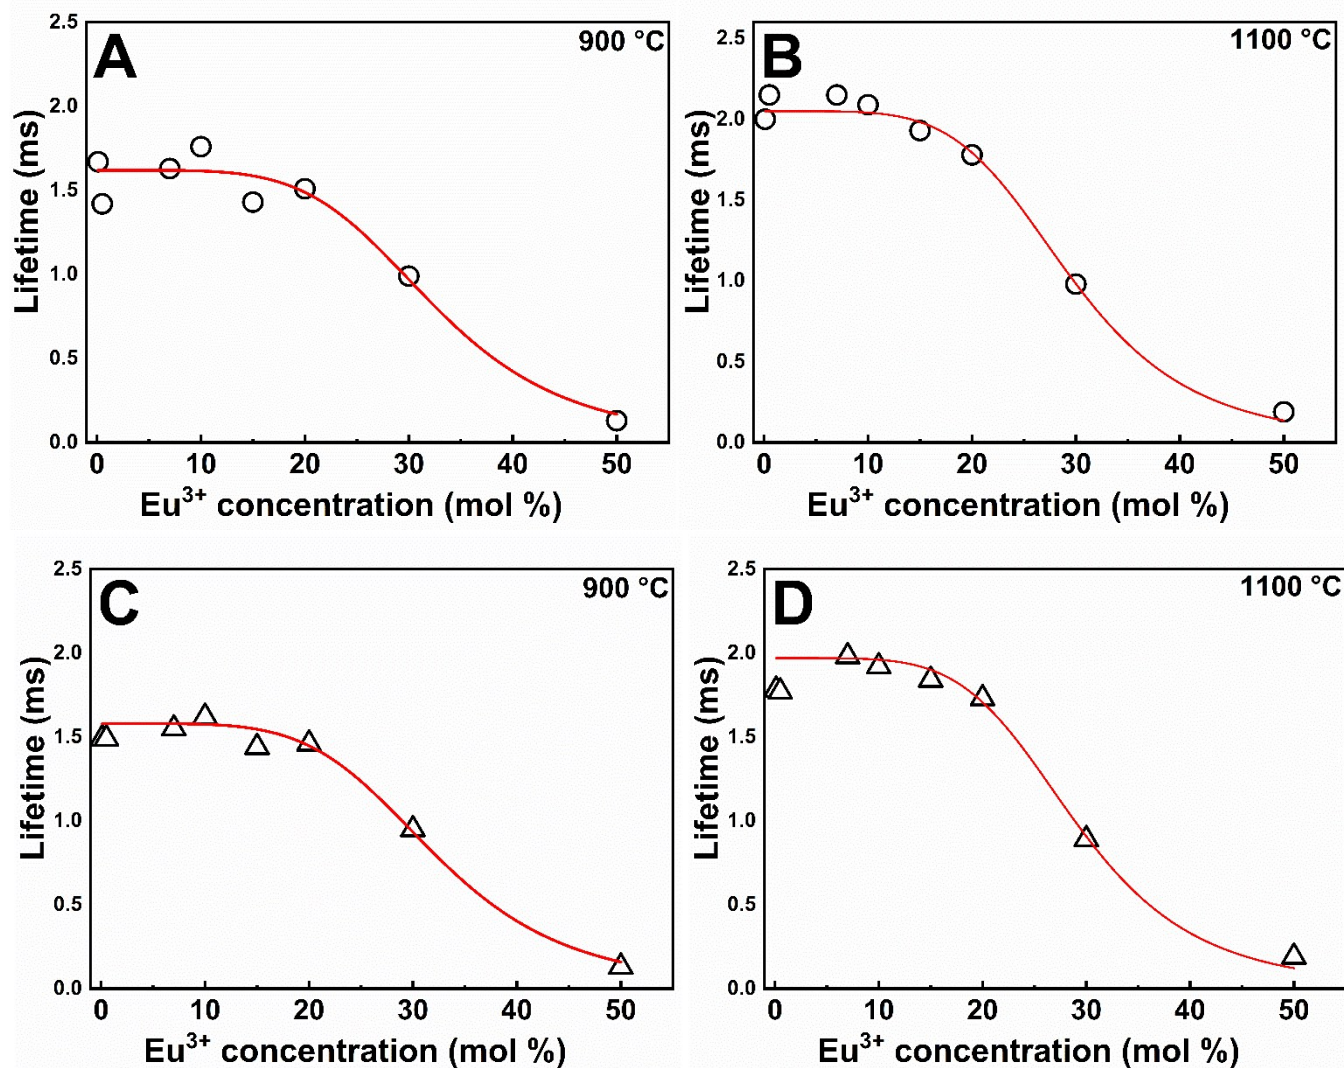

Figure S8. Lifetime values ( $\tau_{\text{obs}}$ ) as a function of  $\text{Eu}^{3+}$  concentration (from 0.1 [30] up to 50 mol %) under (A, B) 393.0 nm and (C, D) 464.0 nm, with fixed emission at 607.0 nm of yttrium tantalate samples annealed at 900 or 1100 °C. The lines are visual guides.



## References

- 1 E. M. Patterson, C. E. Shelden and B. H. Stockton, *Appl. Opt.*, 1977, **16**, 729.
- 2 D. A. Neumayer and E. Cartier, *J. Appl. Phys.*, 2001, **90**, 1801–1808.
- 3 J. L. Ferrari, K. O. Lima, L. J. Q. Maia, S. J. L. Ribeiro and R. R. Gonçalves, *J. Am. Ceram. Soc.*, 2011, **94**, 1230–1237.
- 4 E. J. Popovici, M. Nazarov, L. Muresan, D. Y. Noh, L. B. Tudoran, E. Bica and E. Indrea, *J. Alloys Compd.*, 2010, **497**, 201–209.
- 5 G. Blasse and G. P. M. Van Den Heuvel, *Phys. Status Solidi*, 1973, **19**, 111–117.
- 6 A. Mesaros, M. Nasui, T. Petrisor, L. Ciontea and T. Petrisor, *J. Alloys Compd.*, 2012, **543**, 221–226.
